# Supplementary material
Source: MDPI journal article supplement (https://www.mdpi.com/1424-2818/15/2/230)
Supplement: s1 [file s1]

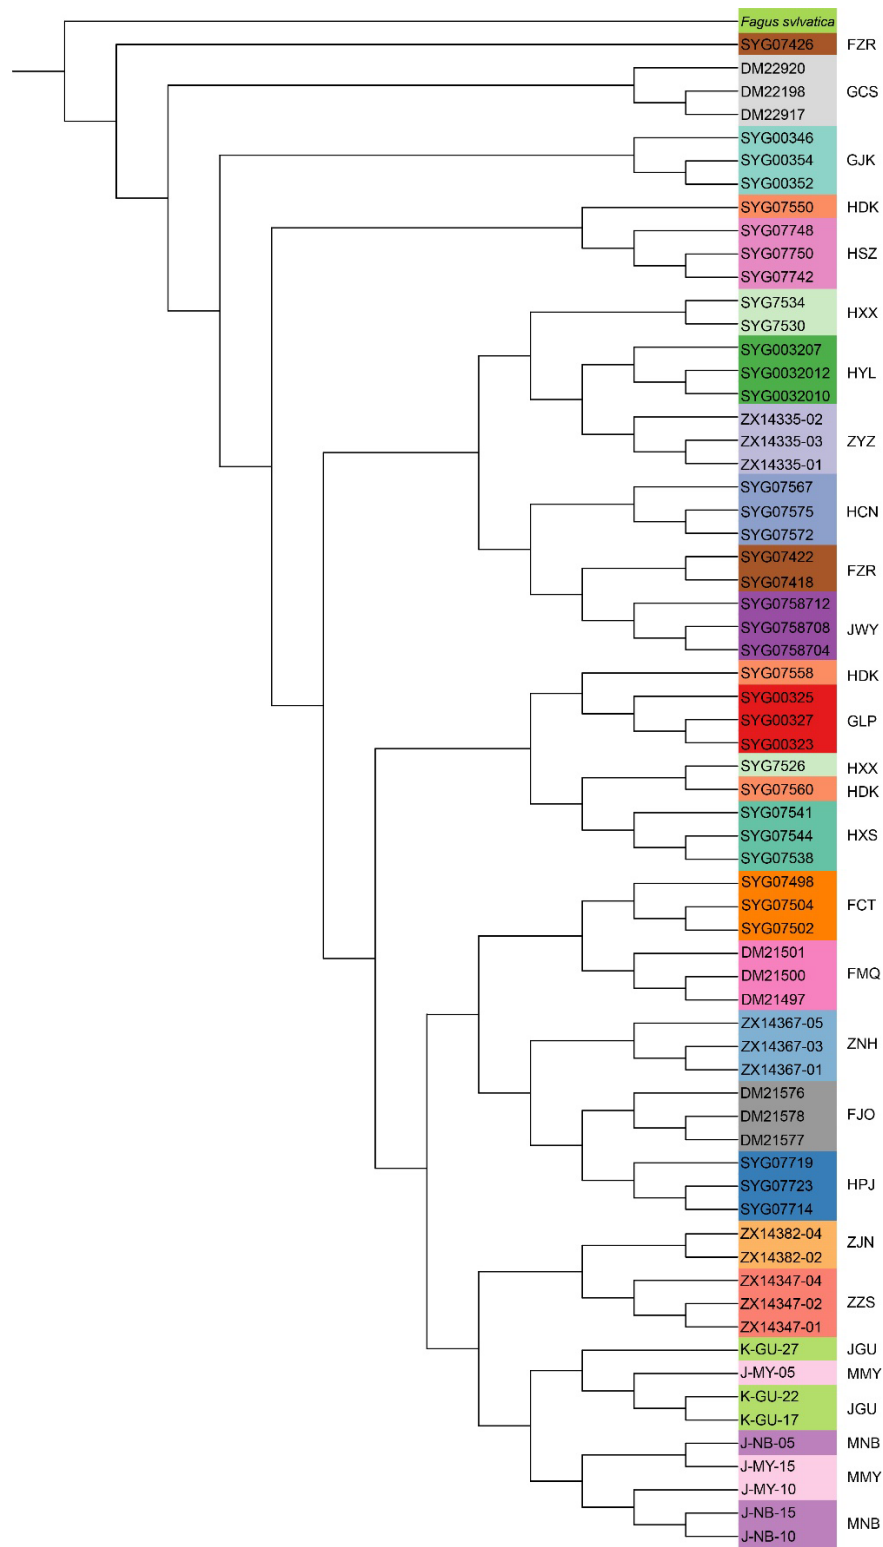

**Figure S1.** The maximum-likelihood (ML) phylogenetic tree of the 22 populations of *Quercus gilva*. The abbreviations of population codes are the same as in Table 2.

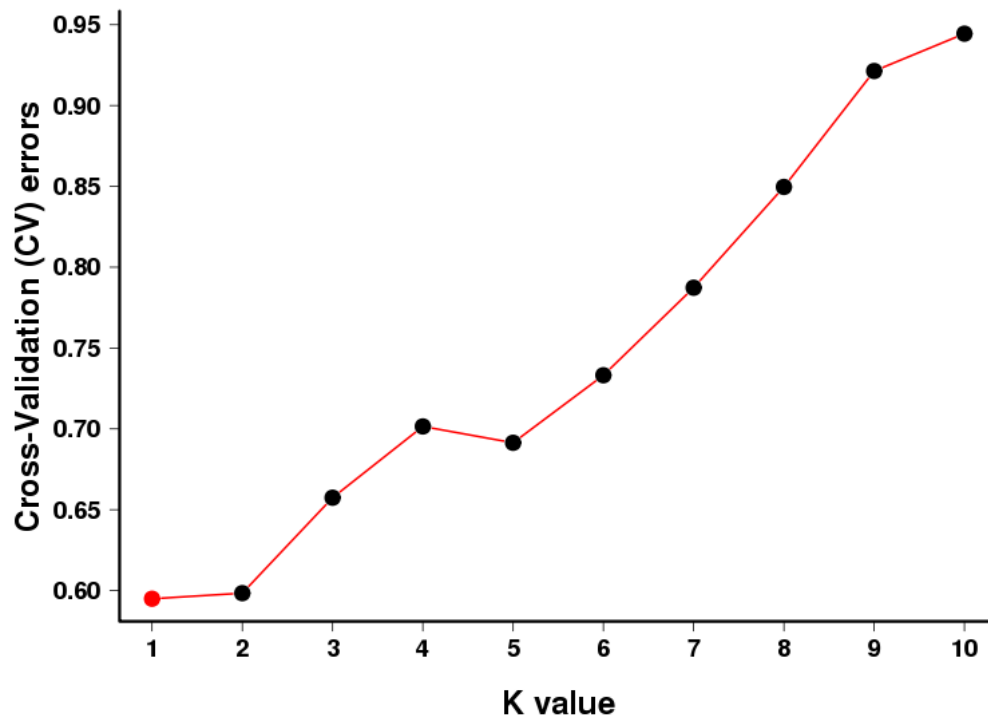

**Figure S2.** ADMIXTURE bar plots for the proportion of genetic membership to each ancestry assuming ( $K = 1$  to 10) ancestral populations.

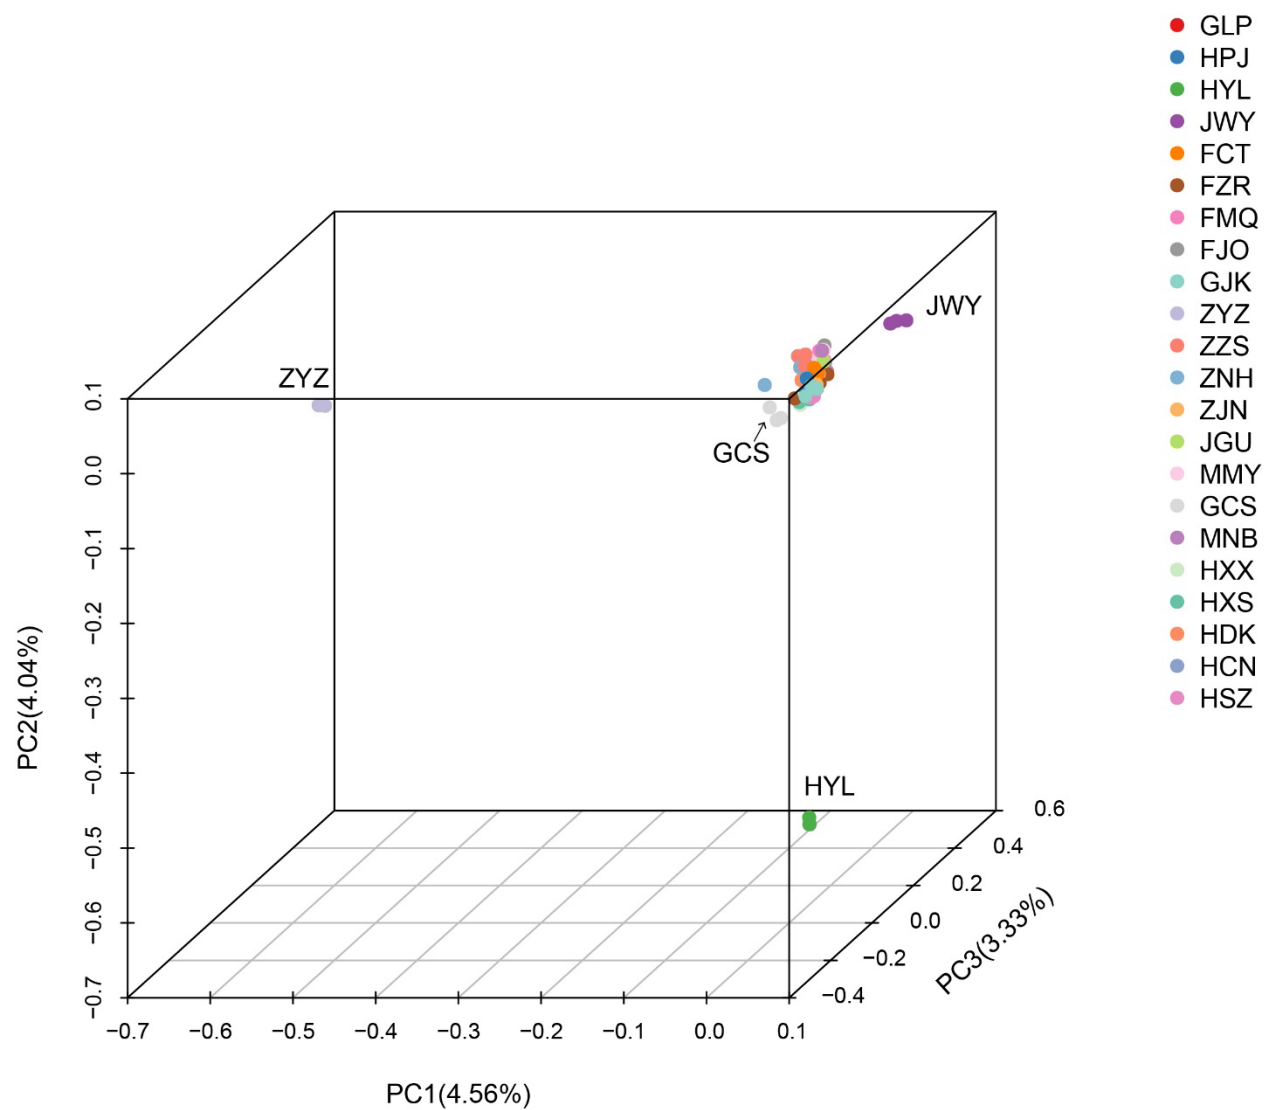

**Figure S3.** PCA (principal component analysis) of 65 individuals of *Q. gilva*. The cycles with different colours represent the different populations. The details of abbreviation codes for populations showed in Table 2.

**Table S1.** Information of each individual and population used in our study, and the quality of sequencing. The abbreviations of population codes are the same as in Table 2.

| Individual ID | Population ID | Latitude | Longitude | Altitude | Clean reads | Q20 (%) | Q30 (%) | GC (%) | Mapped (%) | Average daph | Location                                                     |
|---------------|---------------|----------|-----------|----------|-------------|---------|---------|--------|------------|--------------|--------------------------------------------------------------|
| SYG00323      | GLP           | 26.3919  | 109.1481  | 450      | 31794016    | 94.16   | 86.48   | 35.69  | 93.98      | 9            | Gong-Zhai and Shao-Zhai, Liping, Qiandongnan, Guizhou, China |
| SYG00325      | GLP           | 26.3919  | 109.1481  | 450      | 31322951    | 94.23   | 86.64   | 36.42  | 94.37      | 9            | Gong-Zhai and Shao-Zhai, Liping, Qiandongnan, Guizhou, China |
| SYG00327      | GLP           | 26.3919  | 109.1481  | 450      | 31322951    | 94.53   | 87.16   | 35.61  | 96.37      | 10           | Gong-Zhai and Shao-Zhai, Liping, Qiandongnan, Guizhou, China |
| SYG00346      | GJK           | 27.5452  | 108.6745  | 570      | 63886847    | 96.45   | 90.93   | 39.03  | 85.48      | 17           | Xin-Tain village, Jiangkou, Tongren, Guizhou, China          |
| SYG00352      | GJK           | 27.5452  | 108.6745  | 570      | 31598335    | 96.62   | 91.27   | 37.75  | 86.16      | 8            | Xin-Tain village, Jiangkou, Tongren, Guizhou, China          |
| SYG00354      | GJK           | 27.5452  | 108.6745  | 570      | 32601265    | 94.62   | 87.35   | 35.82  | 95.96      | 10           | Xin-Tain village, Jiangkou, Tongren, Guizhou, China          |
| DM22917       | GCS           | 26.0374  | 106.2831  | 1321     | 32177249    | 94.83   | 87.73   | 38.64  | 84.9       | 8            | Tuan-Po village, Changshun, Qiannan, Guizhou, China          |
| DM22918       | GCS           | 26.0374  | 106.2831  | 1321     | 32647090    | 94.6    | 87.31   | 38.37  | 89.02      | 9            | Tuan-Po village, Changshun, Qiannan, Guizhou, China          |
| DM22920       | GCS           | 26.0374  | 106.2831  | 1321     | 32180663    | 96.61   | 91.24   | 36.87  | 96.81      | 10           | Tuan-Po village, Changshun, Qiannan, Guizhou, China          |
| SYG07526      | HXX           | 27.7207  | 112.5519  | 128      | 33647908    | 96.5    | 90.99   | 35.61  | 96.68      | 10           | Dongtai mountain, Xiangxiang, Hunan, China                   |
| SYG07530      | HXX           | 27.7207  | 112.5519  | 128      | 64168110    | 96.26   | 90.42   | 35.02  | 98.71      | 20           | Dongtai mountain, Xiangxiang, Hunan, China                   |
| SYG07534      | HXX           | 27.7207  | 112.5519  | 128      | 33644688    | 96.44   | 90.86   | 35.64  | 95.81      | 10           | Dongtai mountain, Xiangxiang, Hunan, China                   |
| SYG07538      | HXS           | 27.5301  | 111.4098  | 317      | 33126091    | 96.07   | 90.05   | 35.82  | 97.27      | 10           | Cai-Jia-Xi, Xinshao, Shaoyang, Hunan, China                  |
| SYG07541      | HXS           | 27.5301  | 111.4098  | 317      | 33518757    | 96.79   | 91.6    | 36.36  | 95.56      | 10           | Cai-Jia-Xi, Xinshao, Shaoyang, Hunan, China                  |
| SYG07544      | HXS           | 27.5301  | 111.4098  | 317      | 33397628    | 96.5    | 90.96   | 36.37  | 92.97      | 10           | Cai-Jia-Xi, Xinshao, Shaoyang, Hunan, China                  |
| SYG07550      | HDK           | 27.1413  | 110.4706  | 514      | 34349641    | 96.52   | 91.07   | 39.55  | 79.23      | 8            | Zhu-Shan-Wan, Dongkou, Shaoyang, Hunan, China                |

|             |     |         |          |     |          |       |       |       |       |    |                                                                   |
|-------------|-----|---------|----------|-----|----------|-------|-------|-------|-------|----|-------------------------------------------------------------------|
| SYG07558    | HDK | 27.1413 | 110.4706 | 514 | 32580366 | 96.76 | 91.57 | 37.51 | 90.72 | 9  | Zhu-Shan-Wan, Dongkou, Shaoyang, Hunan, China                     |
| SYG07560    | HDK | 27.1413 | 110.4706 | 514 | 34165833 | 96.25 | 90.46 | 37.08 | 90.39 | 10 | Zhu-Shan-Wan, Dongkou, Shaoyang, Hunan, China                     |
| SYG07567    | HCN | 26.3806 | 112.5138 | 138 | 32762907 | 96.46 | 90.9  | 37.21 | 92.47 | 9  | Chen-Xi Kindgarden, Changning, Hengyang, Hunan, China             |
| SYG07572    | HCN | 26.3806 | 112.5138 | 138 | 32519145 | 96.57 | 91.17 | 36.31 | 98.67 | 10 | Chen-Xi Kindgarden, Changning, Hengyang, Hunan, China             |
| SYG07575    | HCN | 26.3806 | 112.5138 | 138 | 34098824 | 96.65 | 91.27 | 36.55 | 96    | 10 | Chen-Xi Kindgarden, Changning, Hengyang, Hunan, China             |
| SYG07742    | HSZ | 29.2443 | 109.9999 | 567 | 33191279 | 96.07 | 89.96 | 37.24 | 89.35 | 9  | Wang-Jia-Po, Chen-Jia village, Sangzhi, Zhangjiajie, Hunan, China |
| SYG07748    | HSZ | 29.2443 | 109.9999 | 567 | 32365924 | 95.04 | 88.12 | 42.95 | 69.91 | 7  | Wang-Jia-Po, Chen-Jia village, Sangzhi, Zhangjiajie, Hunan, China |
| SYG07750    | HSZ | 29.2443 | 109.9999 | 567 | 32365924 | 94.58 | 87.24 | 37.12 | 91.77 | 9  | Wang-Jia-Po, Chen-Jia village, Sangzhi, Zhangjiajie, Hunan, China |
| SYG07714    | HPJ | 28.585  | 113.8866 | 269 | 31504497 | 94.5  | 87.1  | 39.44 | 86.17 | 8  | Xin-Wu-Li, Lu-Shan-Lin-Chang, Pingjiang, Yueyang, Hunan, China    |
| SYG07719    | HPJ | 28.585  | 113.8866 | 269 | 32302055 | 94.4  | 86.93 | 36.53 | 91.1  | 9  | Xin-Wu-Li, Lu-Shan-Lin-Chang, Pingjiang, Yueyang, Hunan, China    |
| SYG07723    | HPJ | 28.585  | 113.8866 | 269 | 32414654 | 94.71 | 87.5  | 35.6  | 93.51 | 9  | Xin-Wu-Li, Lu-Shan-Lin-Chang, Pingjiang, Yueyang, Hunan, China    |
| SYG00320-7  | HYL | 26.0833 | 113.7404 | 830 | 31980515 | 94.59 | 87.25 | 38.78 | 90.65 | 9  | Qiao-Jiao-Tou, Yanling, Zhuzhou, Hunan, China                     |
| SYG00320-10 | HYL | 26.0833 | 113.7404 | 830 | 32230588 | 94.19 | 86.57 | 35.23 | 97.03 | 10 | Qiao-Jiao-Tou, Yanling, Zhuzhou, Hunan, China                     |
| SYG00320-12 | HYL | 26.0833 | 113.7404 | 830 | 31574192 | 94.82 | 87.71 | 35.67 | 95.48 | 9  | Qiao-Jiao-Tou, Yanling, Zhuzhou, Hunan, China                     |
| SYG07587-04 | JWY | 29.1934 | 117.902  | 122 | 32025173 | 96.47 | 90.9  | 35.45 | 97.65 | 10 | Liu-Fang, Yi-Du village, Wuyuan, Jiangxi, China                   |
| SYG07587-08 | JWY | 29.1934 | 117.902  | 122 | 31974123 | 94.78 | 87.62 | 35.33 | 97.2  | 10 | Liu-Fang, Yi-Du village, Wuyuan, Jiangxi, China                   |
| SYG07587-12 | JWY | 29.1934 | 117.902  | 122 | 62737443 | 94.68 | 87.45 | 36.98 | 94.28 | 19 | Liu-Fang, Yi-Du village, Wuyuan, Jiangxi, China                   |
| SYG07498    | FCT | 25.9848 | 116.4154 | 800 | 62255559 | 94.53 | 87.15 | 36.76 | 93.84 | 18 | She-Bei, Changting, Longyan, Fujian, China                        |
| SYG07502    | FCT | 25.9848 | 116.4154 | 800 | 32637830 | 94.78 | 87.63 | 38.73 | 73.31 | 7  | She-Bei, Changting, Longyan, Fujian, China                        |

|            |     |         |          |     |          |       |       |       |       |    |                                                                      |
|------------|-----|---------|----------|-----|----------|-------|-------|-------|-------|----|----------------------------------------------------------------------|
| SYG07504   | FCT | 25.9848 | 116.4154 | 800 | 33627304 | 96.37 | 90.69 | 37.6  | 88.56 | 9  | She-Bei, Changting, Longyan, Fujian, China                           |
| SYG07418   | FZR | 27.2653 | 119.8494 | 785 | 32325602 | 96.3  | 90.53 | 35.3  | 95.1  | 9  | Shi-Gu-Lan village, Zherong, Ningde, Fujian, China                   |
| SYG07422   | FZR | 27.2653 | 119.8494 | 785 | 30932885 | 96.49 | 90.92 | 36.32 | 95.27 | 9  | Shi-Gu-Lan village, Zherong, Ningde, Fujian, China                   |
| SYG07426   | FZR | 27.2653 | 119.8494 | 785 | 32607056 | 96.85 | 91.77 | 36.03 | 90.86 | 8  | Shi-Gu-Lan village, Zherong, Ningde, Fujian, China                   |
| DM21497    | FMQ | 26.242  | 118.7464 | 639 | 66731674 | 96.51 | 90.96 | 35.66 | 97.7  | 21 | Bai-Yun village, Minqing, Fuzhou, Fujian, China                      |
| DM21500    | FMQ | 26.242  | 118.7464 | 639 | 32355707 | 96.52 | 91.03 | 35.66 | 97.85 | 10 | Bai-Yun village, Minqing, Fuzhou, Fujian, China                      |
| DM21501    | FMQ | 26.242  | 118.7464 | 639 | 32603000 | 96.6  | 91.19 | 35.83 | 95.79 | 10 | Bai-Yun village, Minqing, Fuzhou, Fujian, China                      |
| DM21576    | FJO | 27.3141 | 118.5333 | 863 | 32102078 | 96.63 | 91.28 | 35.58 | 98.19 | 10 | Qing-Tian-Yan village, Jian'ou, Nanping, Fujian,China                |
| DM21577    | FJO | 27.3141 | 118.5333 | 863 | 33375615 | 96.86 | 91.79 | 36.29 | 95.97 | 10 | Qing-Tian-Yan village, Jian'ou, Nanping, Fujian,China                |
| DM21578    | FJO | 27.3141 | 118.5333 | 863 | 32279570 | 96.65 | 91.3  | 35.72 | 97.43 | 10 | Qing-Tian-Yan village, Jian'ou, Nanping, Fujian,China                |
| ZX14335-01 | ZYZ | 29.7645 | 121.2933 | 81  | 37342616 | 96.44 | 90.22 | 36.99 | 86.56 | 10 | Zhong-Po-Shan forest park, Yinzhou, Ningbo, Zhejiang, China          |
| ZX14335-02 | ZYZ | 29.7645 | 121.2933 | 81  | 29678065 | 96.64 | 91.46 | 36.72 | 88.98 | 8  | Zhong-Po-Shan forest park, Yinzhou, Ningbo, Zhejiang, China          |
| ZX14335-03 | ZYZ | 29.7645 | 121.2933 | 81  | 31943266 | 96.61 | 91.19 | 36.32 | 90.9  | 9  | Zhong-Po-Shan forest park, Yinzhou, Ningbo, Zhejiang, China          |
| ZX14347-01 | ZZS | 30.0156 | 122.3961 | 201 | 32814625 | 96.46 | 90.88 | 37.06 | 93.44 | 9  | Pu-Tuo mountain, Pu-Tuo island, Zhoushan, Zhejiang,China             |
| ZX14347-02 | ZZS | 30.0156 | 122.3961 | 201 | 32877069 | 96.54 | 91.04 | 37.02 | 88.69 | 9  | Pu-Tuo mountain, Pu-Tuo island, Zhoushan, Zhejiang,China             |
| ZX14347-04 | ZZS | 30.0156 | 122.3961 | 201 | 31979261 | 96.65 | 91.27 | 39.87 | 78.11 | 8  | Pu-Tuo mountain, Pu-Tuo island, Zhoushan, Zhejiang,China             |
| ZX14367-01 | ZNH | 29.2032 | 121.3988 | 187 | 65572606 | 96.75 | 91.5  | 37.72 | 83.05 | 17 | Huang-Qi-Shan village, Yi-Shi town, Ninghai, Ningbo, Zhejiang, China |
| ZX14367-03 | ZNH | 29.2032 | 121.3988 | 187 | 36439171 | 94.89 | 87.8  | 38.75 | 81.77 | 9  | Huang-Qi-Shan village, Yi-Shi town, Ninghai, Ningbo, Zhejiang, China |
| ZX14367-05 | ZNH | 29.2032 | 121.3988 | 187 | 35836909 | 95.24 | 88.42 | 40.11 | 80.84 | 9  | Huang-Qi-Shan village, Yi-Shi town, Ninghai, Ningbo, Zhejiang, China |

|            |     |         |          |     |          |       |       |       |       |    |                                                   |
|------------|-----|---------|----------|-----|----------|-------|-------|-------|-------|----|---------------------------------------------------|
| ZX14382-02 | ZJN | 28.0197 | 119.8168 | 445 | 31999234 | 96.75 | 91.22 | 41.69 | 62.48 | 6  | Xia-He village, Jingning, Lishui, Zhejiang, China |
| ZX14382-04 | ZJN | 28.0197 | 119.8168 | 445 | 30945354 | 95.04 | 88.21 | 41.58 | 72.68 | 8  | Xia-He village, Jingning, Lishui, Zhejiang, China |
| K-GU-17    | JGU | 33.3023 | 126.2768 | 133 | 33082058 | 95.9  | 89.65 | 35.52 | 98.82 | 10 | Gueok-ri, Daejeong-eup, Jeju, South Korea         |
| K-GU-22    | JGU | 33.3023 | 126.2768 | 133 | 32968710 | 96.53 | 91.05 | 35.01 | 92.28 | 9  | Gueok-ri, Daejeong-eup, Jeju, South Korea         |
| K-GU-27    | JGU | 33.3023 | 126.2768 | 133 | 32554737 | 96.54 | 91.05 | 35.38 | 98.61 | 10 | Gueok-ri, Daejeong-eup, Jeju, South Korea         |
| j-MY-05    | MMY | 31.8488 | 131.225  |     | 67906031 | 93.82 | 85.92 | 35.96 | 96.98 | 21 | Miyakonojo-shi, Miyazaki Prefecture, Japan        |
| j-MY-10    | MMY | 31.8488 | 131.225  |     | 32287290 | 94.06 | 86.41 | 37.07 | 91.3  | 9  | Miyakonojo-shi, Miyazaki Prefecture, Japan        |
| j-MY-15    | MMY | 31.8488 | 131.225  |     | 32939666 | 94.51 | 87.15 | 36.73 | 98.13 | 10 | Miyakonojo-shi, Miyazaki Prefecture, Japan        |
| j-NB-05    | MNB | 32.6544 | 131.6873 |     | 31594700 | 94.25 | 86.7  | 36.78 | 96.72 | 9  | Nobeoka-shi, Miyazaki Prefecture, Japan           |
| j-NB-10    | MNB | 32.6544 | 131.6873 |     | 34232023 | 94.9  | 87.84 | 37.1  | 96.79 | 10 | Nobeoka-shi, Miyazaki Prefecture, Japan           |
| j-NB-15    | MNB | 32.6544 | 131.6873 |     | 36415671 | 95.08 | 88.2  | 37.49 | 92.64 | 10 | Nobeoka-shi, Miyazaki Prefecture, Japan           |

**Table S2.** All the information of population status of *Q. gilva*.

| Country | Location                                                        | Latitude | Longitude | Altitude | Number of individuals | Habitat         | Source of information |
|---------|-----------------------------------------------------------------|----------|-----------|----------|-----------------------|-----------------|-----------------------|
| China   | Chenjia, Beilun, Ningbo, Zhejiang                               | 121.8815 | 29.79042  | 176      | <10                   | Temple          | our field survey      |
| China   | Gongtong Village, Beilun, Ningbo, Zhejiang                      | 121.8328 | 29.81101  | 151      | <10                   | Fengshui Forest | our field survey      |
| China   | Guanyindian Village, Beilun, Ningbo, Zhejiang                   | 121.8371 | 29.79846  | 381      | <10                   | Fengshui Forest | our field survey      |
| China   | Taiheli Village, Guoju town, Beilun, Ningbo, Zhejiang           | 122.0771 | 29.871    | 167      | <10                   | Fengshui Forest | our field survey      |
| China   | Shanjiaao Village, Huangboao Town, Xiangshan, Ningbo, Zhejiang  | 121.8471 | 29.5406   | 117      | <10                   | Fengshui Forest | our field survey      |
| China   | Jinzhukeng Village, Huangboao Town, Xiangshan, Ningbo, Zhejiang | 121.7281 | 29.42306  | 99       | <10                   | Fengshui Forest | our field survey      |
| China   | Zhushan Village, Xiangshan, Ningbo, Zhejiang                    | 121.9302 | 29.55438  | 77       | 1                     | Fengshui Forest | our field survey      |
| China   | Maoyang Village, Xiangshan, Ningbo, Zhejiang                    | 121.8433 | 29.3855   | 72       | <10                   | Fengshui Forest | our field survey      |
| China   | Tiantongsi to Taibaishan, Beilun, Ningbo, Zhejiang              | 121.8002 | 29.80907  | 450      | 15                    | Fengshui Forest | our field survey      |

|       |                                                           |          |          |     |         |                   |                  |
|-------|-----------------------------------------------------------|----------|----------|-----|---------|-------------------|------------------|
| China | Putuo Island, Putuo, Zhoushan, Zhejiang                   | 122.3961 | 30.01555 | 340 | 10      | Fengshui Forest   | our field survey |
| China | Xiaheshan Village, Bohai, Jingning, Lishui, Zhejiang      | 119.8168 | 28.01966 | 445 | 3       | Fengshui Forest   | our field survey |
| China | Yanping, Xiading Village, Jiulongshan, Suichang, Zhejiang | 118.9806 | 28.3675  | 561 | 2       | In nature reserve | our field survey |
| China | Xianglong Village, Pingnan, Ningde, Fujian                | 119.1595 | 26.93752 | 692 | 100-500 | Fengshui Forest   | our field survey |
| China | Gulan Village, Zherong, Ningde, Fujian                    | 119.8495 | 27.26547 | 708 | 25      | Fengshui Forest   | our field survey |
| China | Shebei and Zhutang, Changting, Longyan, Fujian            | 116.4156 | 25.98479 | 793 | 25      | Fengshui Forest   | our field survey |
| China | Qingtianyan Village, Jian'ou, Nanping, Fujian             | 118.5333 | 27.3141  | 863 | >500    | Fengshui Forest   | our field survey |
| China | Baiyun Village, Minqing, Fuzhou, Hunan                    | 118.7464 | 26.24198 | 639 | 15      | Fengshui Forest   | our field survey |
| China | Liufang, Yidu Village, Wuyuan, Jiangxi                    | 117.902  | 29.19336 | 110 | 15      | Fengshui Forest   | our field survey |
| China | Xuanjiashan, Haixing Village, Pengze, Jiujiang, Jiangxi   | 116.8681 | 29.9369  | 114 | 1       | Fengshui Forest   | our field survey |
| China | Qiaojiaotou, Yanling, Zhuzhou, Hunan                      | 113.7629 | 26.1294  | 681 | 5       | Fengshui Forest   | our field survey |
| China | Xinwuli, Lushanlinchang, Pingjiang, Yueyang, Hunan        | 113.8866 | 28.58504 | 262 | 30-100  | In nature reserve | our field survey |
| China | Xiangjiayu, Sangzhi, Zhangjiajie, Hunan                   | 110.239  | 29.35275 | 625 | 30-100  | In nature reserve | our field survey |
| China | Wangjiapo, Chenjia Village, Sangzhi, Zhangjiajie, Hunan   | 109.9999 | 29.24432 | 483 | 30-100  | Fengshui Forest   | our field survey |
| China | Dongtaishan, Xiangxiang, Hunan                            | 112.5519 | 27.72068 | 125 | 30-100  | In forest         | our field survey |
| China | Caijiayi, Xinshao, Shaoyang, Hunan                        | 111.4098 | 27.53008 | 259 | 30-100  | In forest         | our field survey |
| China | Chenxi Kindergarten, G364, Changning, Hengyang, Hunan     | 112.5138 | 26.38065 | 94  | 30-100  | In forest         | our field survey |
| China | Shaba S230, Sangzhi, Zhangjiajie, Hunan                   | 110.0186 | 29.27584 | 466 | 8       | In forest         | our field survey |
| China | Zhangjiadalaozhai, Jingzhou, Huaihua, Hunan               | 109.484  | 26.71377 | 400 | 5       | In forest         | our field survey |
| China | Mengchong, Tongdao, Huaihua, Hunan                        | 109.8114 | 26.36642 | 391 | 100-500 | Fengshui Forest   | our field survey |
| China | Dashiban Village, Huitong, Huaihua, Hunan                 | 109.7425 | 26.88467 | 331 | 12      | Fengshui Forest   | our field survey |
| China | Miaozhai, Chaliu Village, Suining, Shaoyang, Hunan        | 110.2874 | 26.59422 | 402 | 14      | Fengshui Forest   | our field survey |
| China | Maoping, Xinshao, Shaoyang, Hunan                         | 111.3512 | 27.44108 | 296 | 12      | Fengshui Forest   | our field survey |



|       |                                                        |          |          |      |                |                 |                      |
|-------|--------------------------------------------------------|----------|----------|------|----------------|-----------------|----------------------|
| China | Xinshao to Zishui X033, Shaoyang, Hunan                | 111.3566 | 27.44705 | 247  | 7              | Fengshui Forest | our field survey     |
| China | Hengshanxi Village, Xinhua, Loudi, Hunan               | 111.1355 | 27.76895 | 303  | 50             | Fengshui Forest | our field survey     |
| China | Laofenghuangsi, Z010, Lianyuan, Loudi, Hunan           | 111.7572 | 27.52556 | 631  | 50             | Fengshui Forest | our field survey     |
| China | Jindong forest park, Qiyang, Yongzhou, Hunan           | 112.0867 | 26.17391 | 363  | 6              | In forest       | our field survey     |
| China | Gudun, Gaotun, Liping, Qiandongnan, Guizhou            | 109.1481 | 26.39187 | 446  | 45             | Fengshui Forest | our field survey     |
| China | Hongjun bridge, Shaozhai, Liping, Qiandongnan, Guizhou | 109.1487 | 26.3367  | 425  | 63             | Fengshui Forest | our field survey     |
| China | Tuanpo Village, Changshun, Qiandongnan, Guizhou        | 106.2829 | 26.03735 | 1321 | 8              | Fengshui Forest | our field survey     |
| China | Xintian Village, Jiangkou, Tongren, Guizhou            | 108.6742 | 27.5451  | 570  | 70             | Fengshui Forest | our field survey     |
| China | Taiwan                                                 | 120.7382 | 23.58059 | 1044 | No information | No information  | BGCI                 |
| China | Taiwan                                                 | 120.75   | 24.43333 | 331  | No information | No information  | BGCI                 |
| China | Taiwan                                                 | 120.7667 | 22.4     | 1081 | No information | No information  | BGCI                 |
| China | Taiwan                                                 | 120.8167 | 22.98333 | 2319 | No information | No information  | BGCI                 |
| China | Taiwan                                                 | 120.861  | 24.42715 | 272  | No information | No information  | BGCI                 |
| China | Taiwan                                                 | 120.8667 | 23.91667 | 519  | No information | No information  | BGCI                 |
| China | Taiwan                                                 | 120.9045 | 24.36108 | 1090 | No information | No information  | BGCI                 |
| China | Taiwan                                                 | 120.9302 | 24.58866 | 203  | No information | No information  | BGCI                 |
| China | Taiwan                                                 | 120.9401 | 24.50361 | 775  | No information | No information  | BGCI                 |
| China | Taiwan                                                 | 120.9825 | 24.52389 | 981  | No information | No information  | BGCI                 |
| China | Taiwan                                                 | 121.0343 | 24.08916 | 784  | No information | No information  | BGCI                 |
| China | Egongjishan, Taiwan                                    | 121.0819 | 24.6022  | 1430 | 12             | No information  | Sugiura et al., 2015 |
| China | Taiwan                                                 | 121.125  | 24.2389  | 1276 | No information | No information  | BGCI                 |
| China | Tianhu, Taiwan                                         | 121.1781 | 24.6592  | 930  | 2              | No information  | Sugiura et al., 2015 |
| China | Mamei, Taiwan                                          | 121.2794 | 24.6725  | 1379 | 10             | No information  | Sugiura et al., 2015 |
| China | Taiwan                                                 | 121.3193 | 24.74138 | 933  | No information | No information  | BGCI                 |
| China | Taiwan                                                 | 121.3667 | 24.78333 | 465  | No information | No information  | BGCI                 |
| China | Taiwan                                                 | 121.4361 | 24.81667 | 960  | No information | No information  | BGCI                 |
| China | Manyueyuan, Taiwan                                     | 121.4447 | 24.8303  | 381  | 10             | No information  | Sugiura et al., 2015 |
| China | Taiwan                                                 | 121.5156 | 24.60694 | 569  | No information | No information  | BGCI                 |
| China | Taiwan                                                 | 121.5233 | 24.85456 | 886  | No information | No information  | BGCI                 |
| China | Taiwan                                                 | 121.5258 | 25.17278 | 902  | No information | No information  | BGCI                 |

|       |                               |          |          |     |                |                |                      |
|-------|-------------------------------|----------|----------|-----|----------------|----------------|----------------------|
| China | Taiwan                        | 121.5428 | 24.86306 | 385 | No information | No information | BGCI                 |
| China | Taiwan                        | 121.55   | 24.86667 | 132 | No information | No information | BGCI                 |
| China | Taiwan                        | 121.5892 | 25.09389 | 104 | No information | No information | BGCI                 |
| China | Taiwan                        | 121.7941 | 24.88072 | 512 | No information | No information | BGCI                 |
| China | Taiwan                        | 121.8507 | 24.94044 | 352 | No information | No information | BGCI                 |
| China | Fushan, Taiwan                | 121.5936 | 24.7567  | 641 | 12             | No information | Sugiura et al., 2015 |
| Japan | Omura                         | 130.0017 | 32.9392  | 293 | 8              | In the forest  | Sugiura et al., 2015 |
| Japan | Yabe, Fukuoka, Japan          | 130.8342 | 32.12167 | 396 | No information | In the forest  | BGCI                 |
| Japan | Kobayashi                     | 130.9581 | 31.9661  | 261 | 3              | In the forest  | Sugiura et al., 2015 |
| Japan | Kobayashi, Miyazaki, Japan    | 131.1319 | 32.07667 | 434 | No information | In the forest  | BGCI                 |
| Japan | Mine                          | 131.1450 | 34.1117  | 72  | 3              | In the forest  | Sugiura et al., 2015 |
| Japan | Tano                          | 131.2964 | 31.8606  | 184 | 12             | In the forest  | Sugiura et al., 2015 |
| Japan | Ishizuchi                     | 131.3167 | 32.5031  | 387 | 6              | In the forest  | Sugiura et al., 2015 |
| Japan | Miyazaki, Japan               | 131.4219 | 31.79139 | 168 | No information | In the forest  | BGCI                 |
| Japan | Shimanto City, Kochi, Japan   | 132.9167 | 33.23333 | 295 | No information | In the forest  | BGCI                 |
| Japan | Tosashimizu, Kochi, Japan     | 132.9188 | 32.9125  | 101 | No information | In the forest  | BGCI                 |
| Japan | Shimanto, Kochi, Japan        | 132.9438 | 33.27083 | 322 | No information | In the forest  | BGCI                 |
| Japan | Tosashimizu, Kochi, Japan     | 132.95   | 32.83333 | 37  | No information | In the forest  | BGCI                 |
| Japan | Ochi, Kochi, Japan            | 133.2333 | 33.53333 | 252 | No information | In the forest  | BGCI                 |
| Japan | Matuyama                      | 133.2869 | 34.4139  | 52  | 8              | In the forest  | Sugiura et al., 2015 |
| Japan | Susaki, Kochi, Japan          | 133.4563 | 33.42083 | 68  | No information | In the forest  | BGCI                 |
| Japan | Kochi, Japan                  | 133.5667 | 33.63333 | 393 | No information | In the forest  | BGCI                 |
| Japan | Konan, Kochi, Japan           | 133.8188 | 33.62083 | 447 | No information | In the forest  | BGCI                 |
| Japan | Aki, Kochi, Japan             | 133.9333 | 33.6     | 398 | No information | In the forest  | BGCI                 |
| Japan | Umaji, Kochi, Japan           | 134.0333 | 33.56667 | 513 | No information | In the forest  | BGCI                 |
| Japan | Tsurugi, Tokushima, Japan     | 134.0955 | 34.01306 | 252 | No information | In the forest  | BGCI                 |
| Japan | Muroto, Kochi, Japan          | 134.1688 | 33.32917 | 152 | No information | In the forest  | BGCI                 |
| Japan | Yoshinogawa, Tokushima, Japan | 134.2307 | 33.98882 | 439 | No information | In the forest  | BGCI                 |
| Japan | Kamiyama, Tokushima, Japan    | 134.2394 | 33.94155 | 508 | No information | In the forest  | BGCI                 |
| Japan | Kaiyo, Tokushima, Japan       | 134.2433 | 33.5716  | 146 | No information | In the forest  | BGCI                 |
| Japan | Naka, Tokushima, Japan        | 134.292  | 33.80007 | 410 | No information | In the forest  | BGCI                 |
| Japan | Kamiyama, Tokushima, Japan    | 134.3445 | 34.0109  | 353 | No information | In the forest  | BGCI                 |
| Japan | Kamitomda                     | 135.4400 | 33.7264  | 58  | 9              | In the forest  | Sugiura et al., 2015 |
| Japan | Hirai                         | 135.6725 | 33.6689  | 303 | 12             | In the forest  | Sugiura et al., 2015 |
| Japan | Kyotanabe, Wakayama, Japan    | 135.7554 | 33.83379 | 210 | No information | In the forest  | BGCI                 |
| Japan | Tsurugara                     | 136.9461 | 35.5914  | 145 | 5              | In the forest  | Sugiura et al., 2015 |
| Japan | Toyohashi                     | 137.4789 | 34.8208  | 98  | 2              | In the forest  | Sugiura et al., 2015 |
| Japan | Jugei                         | 138.8364 | 34.6992  | 189 | 1              | In the forest  | Sugiura et al., 2015 |

|             |                             |          |          |     |                |               |                      |
|-------------|-----------------------------|----------|----------|-----|----------------|---------------|----------------------|
| Japan       | Higashiizu, Shizuoka, Japan | 139.0462 | 34.86372 | 509 | No information | In the forest | BGCI                 |
| Japan       | Kiyokawa, Kanagawa, Japan   | 139.2781 | 35.47409 | 196 | No information | In the forest | BGCI                 |
| Japan       | Kiyosumi, Chiba, Japan      | 140.1467 | 35.1558  | 239 | 4              | In the forest | Sugiura et al., 2015 |
| South Korea | Jeoji-ri, Jeju Island       | 126.2804 | 33.3113  | 148 | 22             | In the forest | Kim et al., 2018     |
| South Korea | Cheongsu-ri, Jeju Island    | 126.277  | 33.3025  | 123 | 6              | In the forest | Kim et al., 2018     |
| South Korea | Gueok-ri, Jeju Island       | 126.2842 | 33.2971  | 133 | 45             | In the forest | Kim et al., 2018     |
| South Korea | Harye-ri, Jeju Island       | 126.5979 | 33.3209  | 326 | 3              | In the forest | Kim et al., 2018     |
| South Korea | Hwasun-ri, Jeju Island      | 126.3308 | 33.2648  | 122 | 4              | In the forest | Kim et al., 2018     |

---

**Table S3.** Linkage disequilibrium decay measured by  $r^2$  in each population and their position when LD decayed to half of their maximum value. The abbreviations of population codes are the same as in Table 2.

| Population ID        | $r^2$ half | $r^2$ half Decay Value (kb) |
|----------------------|------------|-----------------------------|
| HYL                  | 0.4512162  | 0.269003404                 |
| ZYZ                  | 0.4513042  | 0.274609628                 |
| HSZ                  | 0.3750513  | 85.98902409                 |
| GCS                  | 0.3694775  | 116.421576                  |
| GLP                  | 0.3438865  | 121.1566961                 |
| ZZS                  | 0.3661504  | 136.386704                  |
| HXS                  | 0.352714   | 143.4687669                 |
| HDK                  | 0.3248934  | 168.7951558                 |
| HPJ                  | 0.370401   | 169.4867879                 |
| HCN                  | 0.3302864  | 199.962927                  |
| JGU                  | 0.3294638  | 209.8502125                 |
| MNB                  | 0.3371089  | 223.5478937                 |
| HXX                  | 0.3190013  | 224.1582538                 |
| FJO                  | 0.3630367  | 239.3708329                 |
| FCT                  | 0.3492753  | 337.1761654                 |
| ZNH                  | 0.3348428  | 385.492631                  |
| FMQ                  | 0.3672237  | 388.0594056                 |
| MMY                  | 0.3325408  | 454.941946                  |
| GJK                  | 0.3680512  | 685.2315352                 |
| JWY                  | 0.3866513  | NA                          |
| FZR                  | 0.3734457  | NA                          |
| ZJN                  | 0.4631374  | NA                          |
| <i>Quercus gilva</i> | 0.1573392  | 1.861261788                 |
